# Supplementary material
Source: PubMed Central journal article supplement (PMC4008837)
Supplement: mmc1.pdf [file mmc1.pdf]

## **Lipid phase dependence of Equinatoxin II membrane binding and pore formation**

N. Rojko<sup>1</sup>, B. Cronin<sup>2</sup>, J. S. H. Danial<sup>2</sup>, M. A. B. Baker<sup>2</sup>, G. Anderluh<sup>1,3</sup>, M. I. Wallace<sup>2</sup>.

<sup>1</sup> Department of Biology, Biotechnical faculty, University of Ljubljana, Večna pot, 111, 1000 Ljubljana, Slovenia.

<sup>2</sup> Department of Chemistry, Oxford University, 12 Mansfield Rd, Oxford, OX1 3TA, UK.

<sup>3</sup> National Institute of Chemistry, Hajdrihova 19, 1000 Ljubljana, Slovenia.

*Corresponding authors:* [mark.wallace@chem.ox.ac.uk](mailto:mark.wallace@chem.ox.ac.uk)/[gregor.anderluh@ki.si](mailto:gregor.anderluh@ki.si)

### **Supplementary Movie S1**

EqII-Cy3B (red) pores diffuse in the  $L_d$  phase on a DPhPC:eSM:Chol 4:3:3 bilayer. (a) Functional EqII-Cy3B pores were visualized by the  $Ca^{2+}$  flux through the pore using Fluo-8H fluorescence (green). 17.5 x 17.5  $\mu m$  image. 100 ms per image acquisition. Playback at 40 ms per image.

### **Supplementary Movie S2**

At low EqII-Cy3B concentrations ( $\sim 50$  nM) individual molecules can be resolved. 1D diffusion of EqII-Cy3B at the domain boundaries is evident, as is the presence of EqII-Cy3B in both phases. Scale bar 10  $\mu m$ . Images were recorded at 100 ms. Playback at 40 ms per image.

**Figure S1**

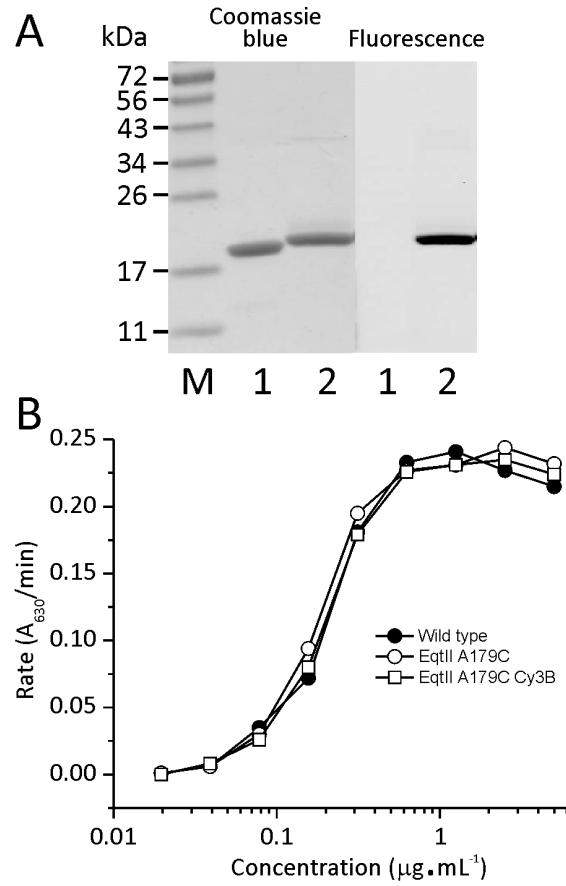

**FIGURE S1: Properties of EqtII A179C-Cy3B. (A)** SDS-PAGE of purified labelled protein (left) and the same gel under UV light prior staining of the gel with Coomassie blue. M, Marker lane; 1, EqtII; 2, EqtII A179C-Cy3B. **(B)** Hemolytic activity measured using the lysis of bovine red blood cells.

**Figure S2**

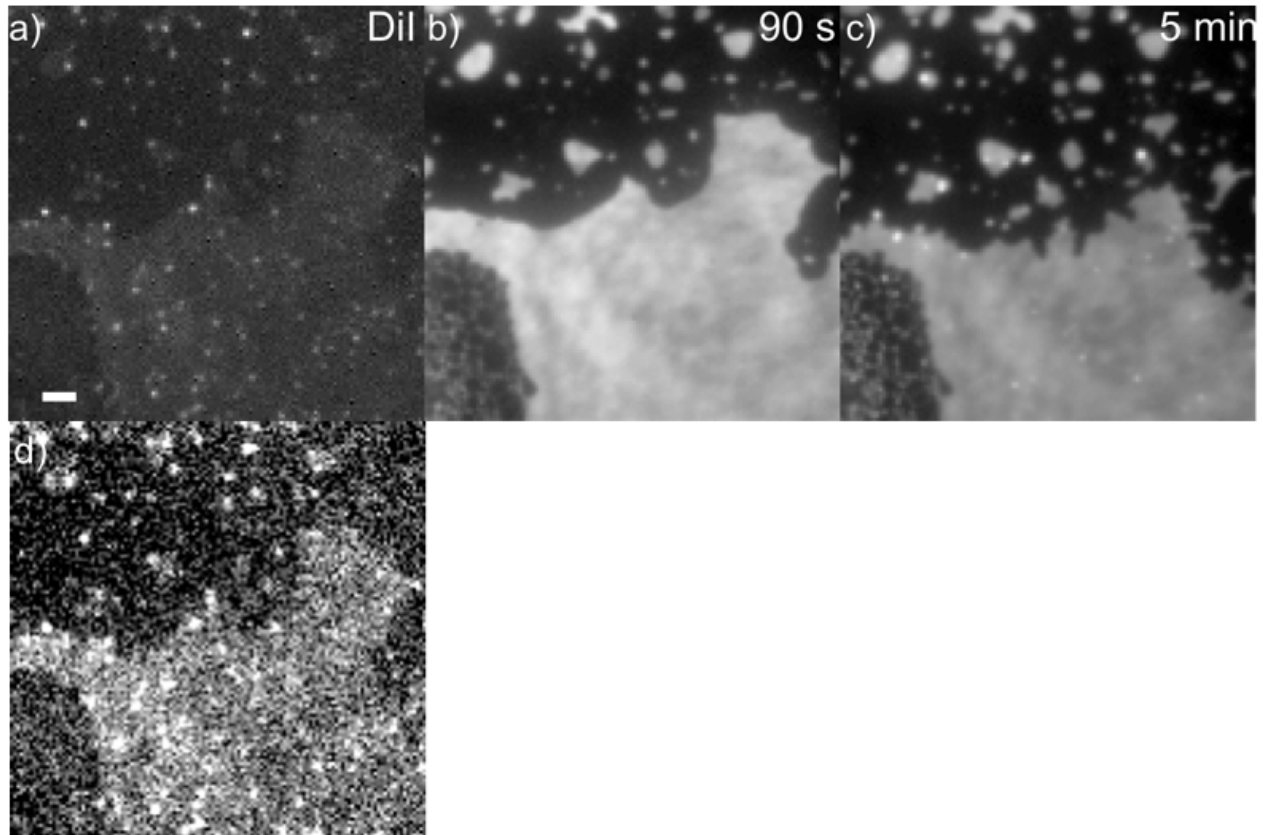

FIGURE S2: Image of a DPhPC:SM:Chol 1:2:2 bilayer containing 0.0001% DiI as a marker for the  $L_d$  phase. (a) DiI fluorescence prior to EqtII injection. Contrast is low in this image, in comparison to panels b and c, as reduced laser power is used to limit premature photobleaching. The bright spots are likely due to oil inclusions below the bilayer in which DiI is highly soluble. (b) EqtII-Cy3b (final concentration approximately 700 nM) was injected into the droplet and image was recorded 90 s after injection. (c) 5 min after injection the addition of the toxin has resulted in a reordering of the lipid in the bilayer. (d) Contrast-enhanced duplicate of (a). Scale bar indicates 10  $\mu\text{m}$ .

**Figure S3**

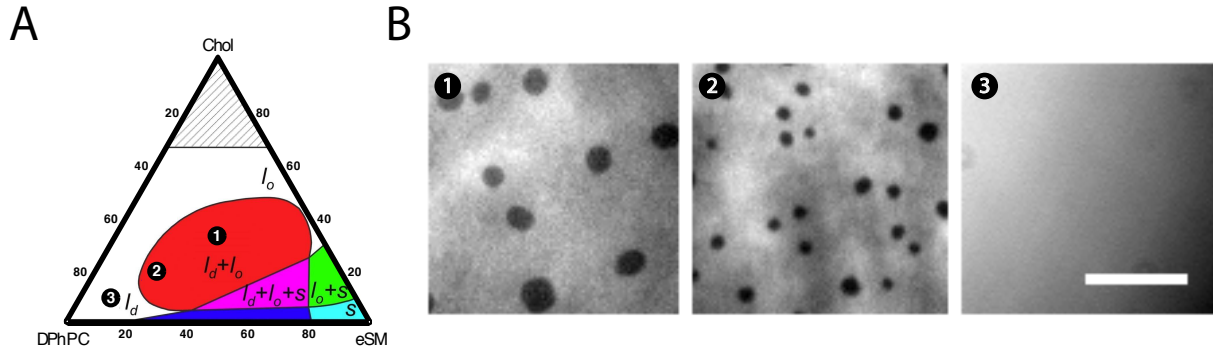

FIGURE S3: Three DPhPC:SM:Chol compositions, expected to correspond to two-phase and single-phase regions of the phase diagram. We are not aware of any published phase diagram for the specific combination of DPhPC:SM:Chol. However in broad terms, phase diagrams for all ternary lipid mixtures of cholesterol with two lipids with different melting temperatures show similarity (1–3). (A) Modified phase diagram from Dimova and co-workers for DOPC:eSM:Chol (4). This is for a different lipid mixture to that used here, but can be used as rough guide to where we might expect phase boundaries to lie. Numbering on this diagram indicates lipid compositions for DPhPC:eSM:Chol chosen to probe the phase diagram (1) 1:1:1, (2) 2:1:1, and (3) 8:1:1. (B) Images of droplet bilayers corresponding to the lipid compositions referred to in (A). Scale bar 10  $\mu\text{m}$ .

Figure S4

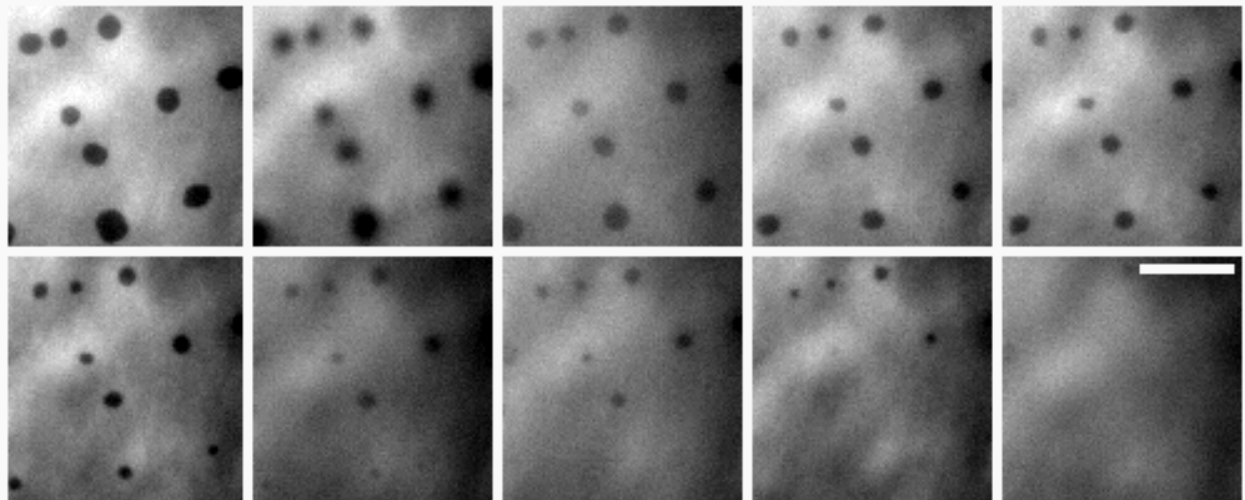

FIGURE S4: Image sequence following heating of a DIB formed from a 1:1:1 DPhPC:SM:Chol mixture with 0.5% *N*-(6-tetramethylrhodaminethiocarbamoyl)-1,2-dihexadecanoyl-*sn*-glycero-3-phosphoethanolamine (TRITC-DHPE) used as marker for the  $L_d$  phase (5). Heating from 22 (top left) to 30°C (bottom right) over a period of 5 minutes results in shrinkage of the area fraction of the putative  $L_o$  phase. Scale bar 10  $\mu\text{m}$ .

**Figure S5**

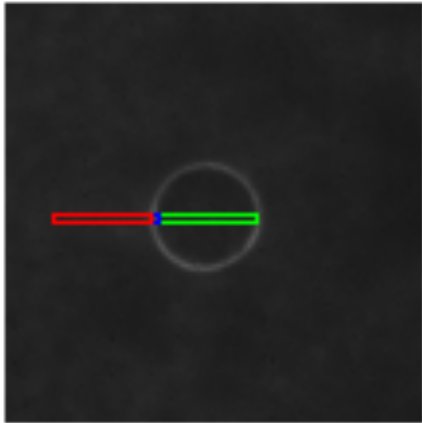

FIGURE S5: Image from Fig 3B depicting the regions of interest used to compute the time-dependent changes in fluorescence intensity seen in Fig. 3D. As per the colour coding of Fig. 3D, red is outside the domain, blue is at the domain boundary, and green is inside the domain boundary.

**Figure S6**

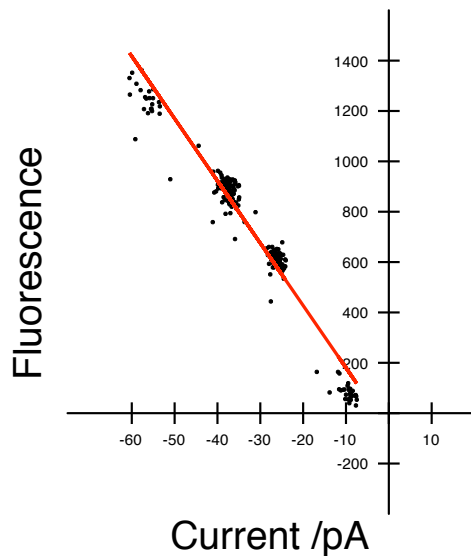

FIGURE S6: (B) Fluorescence-current plot of the data in Fig. 2C is linear.

### **Supplementary References**

1. Feigenson, G.W. 2006. Phase behavior of lipid mixtures. *Nat. Chem. Biol.* 2: 560–563.
2. Feigenson, G.W. 2009. Phase diagrams and lipid domains in multicomponent lipid bilayer mixtures. *Biochim. Biophys. Acta.* 1788: 47–52.
3. Petruzielo, R.S., F.A. Heberle, P. Drazba, J. Katsaras, and G.W. Feigenson. 2013. Phase behavior and domain size in sphingomyelin-containing lipid bilayers. *Biochim. Biophys. Acta Bba - Biomembr.* 1828: 1302–1313.

4. Bezlyepkina, N., R.S. Gracià, P. Shchelokovskyy, R. Lipowsky, and R. Dimova. 2013. Phase Diagram and Tie-Line Determination for the Ternary Mixture DOPC/eSM/Cholesterol. *Biophys. J.* 104: 1456–1464.
5. Stachowiak, J.C., C.C. Hayden, M.A.A. Sanchez, J. Wang, B.C. Bunker, et al. 2011. Targeting Proteins to Liquid-Ordered Domains in Lipid Membranes. *Langmuir.* 27: 1457–1462.
